# Supplementary material for: A fluorine doped carbon aerogel prepared from the spent cathode carbon of aluminum electrolysis towards electrocatalytic synthesis of H2O2
Source: Royal Society of Chemistry journal article supplement (doi:10.1039/d4se01505c), 2024-01-01
Supplement: d4se01505c1.pdf [file d4se01505c1.pdf]

## Supporting Information

### **Fluorine doped carbon aerogel prepared from spent cathode carbon of aluminum electrolysis towards electrocatalytic synthesis of H<sub>2</sub>O<sub>2</sub>**

Zhaoxu Li<sup>1,2</sup>, Yu Liu<sup>1,2</sup>, Junlang Zhang<sup>1,2</sup>, Chao Yang<sup>1</sup>, Xintai Su<sup>3</sup>, Chenyuan Zhu<sup>2</sup>,  
Yongjun Jiang<sup>4</sup>, Wenxin Zhao<sup>4</sup>, Bo Zeng<sup>4</sup>, Chenxi Zhao<sup>4</sup>, Xueli Huang<sup>1\*</sup>, Hongtao  
Xie<sup>2\*</sup>, Yizhao Li<sup>1,2\*</sup>

<sup>1</sup>*State Key Laboratory of Chemistry and Utilization of Carbon Based Energy Resources, College of  
Chemical Engineering and Technology, Xinjiang University, Urumqi 830046, P.R. China.*

<sup>2</sup>*Huzhou Key Laboratory of Smart and Clean Energy, Yangtze Delta Region Institute (Huzhou),  
University of Electronic Science and Technology of China, Huzhou 313001, P.R. China.*

<sup>3</sup>*School of Environment and Energy, Guangdong Provincial Key Laboratory of Solid Wastes  
Pollution Control and Recycling, South China University of Technology, Guangzhou 510006, P.R.  
China.*

<sup>4</sup>*Xinjiang New Energy (group) Environmental Development Co., Ltd., Urumqi 831499, P.R. China.*

\*Corresponding author. Tel: +86-991-8583083; Fax: +86-991-8588883;

E-mail address: liyizhao0809@126.com (Y. Li); xieht@csj.uestc.edu.cn (H. Xie); xuelih@163.com  
(X. Huang).

## Electrode preparation

**For rotating ring disk electrode (RRDE).** The catalyst inks were prepared as follows: 2 mg of prepared catalyst were dispersed in the mixture containing anhydrous ethanol (400  $\mu$ l) and 5 wt.% Nafion (20  $\mu$ l) solution by ultrasonic oscillation for at least 2 h to form a homogeneous suspension. Then, 5  $\mu$ l of homogeneous ink was dropped on the RRDE, (disc area:0.1964 cm<sup>2</sup>) and gently blow dried with a fan.

**For carbon paper.** The catalyst inks were prepared as follows: 2 mg of prepared catalyst was dispersed in the mixture containing anhydrous ethanol (400  $\mu$ l) and 5 wt.% Nafion (20  $\mu$ l) solution by ultrasonic oscillation for at least 2 h to form a homogeneous suspension. The catalyst loading mass is about 0.5 mg.

## Electrochemical measurement

**For RRDE.** The catalyst-coated RRDE electrode is equipped as a working electrode, and then the electrochemical workstation performs cyclic voltammetry (CV) and linear sweep voltammetry (LSV), respectively. To evaluate the response to ORR of samples, the CV test was performed in Ar- and O<sub>2</sub>-saturated electrolyte, respectively, at the scan rate of 10 mV/s, with ring voltage turned off. In addition, the LSV test was conducted in O<sub>2</sub>-saturated electrolyte at the scan rate of 5 mV/s, with the ring voltage setting to 0.335 V (vs. Hg/HgO). The H<sub>2</sub>O<sub>2</sub> selectivity (H<sub>2</sub>O<sub>2</sub> %) and the electron transfer number (n) was calculated by Eq. 1 and 2.

$$H_2O_2 \% = 200 \times \frac{I_R}{I_D + I_R/N} \quad (1)$$

$$n = 4 \times \frac{I_D/N}{I_D + I_R/N} \quad (2)$$

where  $I_R$  is the ring current,  $I_D$  is the disk current, and  $N$  is the collection efficiency.

**For H-type cell.** The H<sub>2</sub>O<sub>2</sub> yield was tested in a H-cell with Nafion-N117 membrane as the separator, at each fixed potential for 1h. In this H-type cell, the cathodic chamber and anodic chamber were filled with 0.1 M KOH of 30 ml and 30 ml, respectively. Firstly, the prepared working electrode was equipped in the H-cell, and

the several cycles CV test was conducted to active the catalysts. Then, the voltage was fixed at certain value, and the run time was set to 1h, and 10  $\mu\text{l}$  of solution was taken out to test  $\text{H}_2\text{O}_2$  concentration. As for the durability test, stability was tested on RRDE by uniformly dropping 5 microliters of ink onto the disk electrode for 10 hours. The  $\text{H}_2\text{O}_2$  yeild was calculated by Eq. 3.

$$Yeild = C_{\text{H}_2\text{O}_2} \times \frac{V}{m_{\text{cat}} \times t} \quad (3)$$

Where V (L) is the volume of the cathode electrolyte that's involved in the reaction,  $m_{\text{cat}}$  (g) is the amount of catalyst involved in the reaction and t (h) is the reaction time.

**Standard curve drawing.** The yellow  $\text{Ce}^{4+}$  solution can be reduced to colorless  $\text{Ce}^{3+}$  by  $\text{H}_2\text{O}_2$  in the electrolyte. The absorbance of  $\text{Ce}^{4+}$  before and after the reaction can be determined by the UV–visible absorption spectrum (UV–Vis), and the measurement wavelength is about 318 nm. Firstly, different concentrations of  $\text{Ce}^{4+}$  solutions (0.1, 0.2, 0.3, 0.4 and 0.5  $\text{mmol L}^{-1}$ ) were configured and the corresponding absorption spectra and standard curves ( $Y=3.9649X+0.0294$ ,  $R^2=0.9988$ ) could be obtained by using UV–Vis to detect different concentrations of  $\text{Ce}^{4+}$  solutions, as shown in Fig. S6 (a). To quantify the generated  $\text{H}_2\text{O}_2$  after electrolysis for 1 h, 10  $\mu\text{L}$  of solution in catholde was added to 4 mL of 0.5  $\text{mmol L}^{-1}$  standard  $\text{Ce}(\text{SO}_4)_2$  solution. The mixture solution was measured by UV–Vis after standing for 2 h, and the yield of  $\text{H}_2\text{O}_2$  was finally determined based on the reduced  $\text{Ce}^{4+}$  concentration.

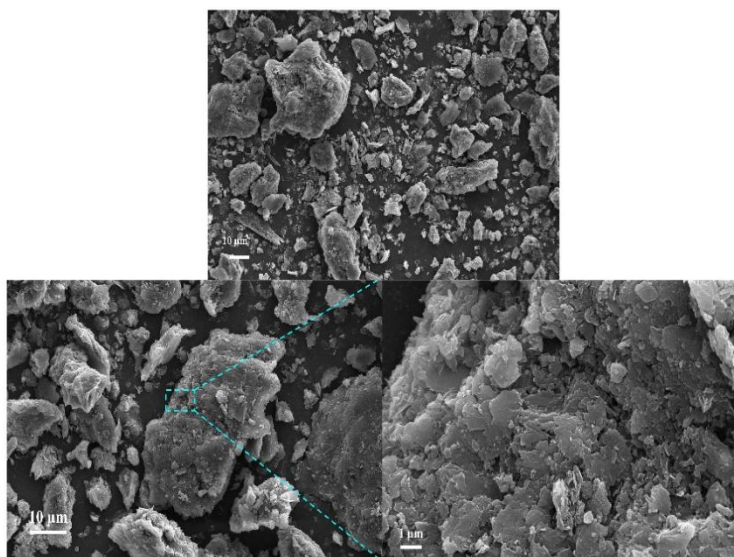

**Fig. S1** SEM images of raw material SCC.

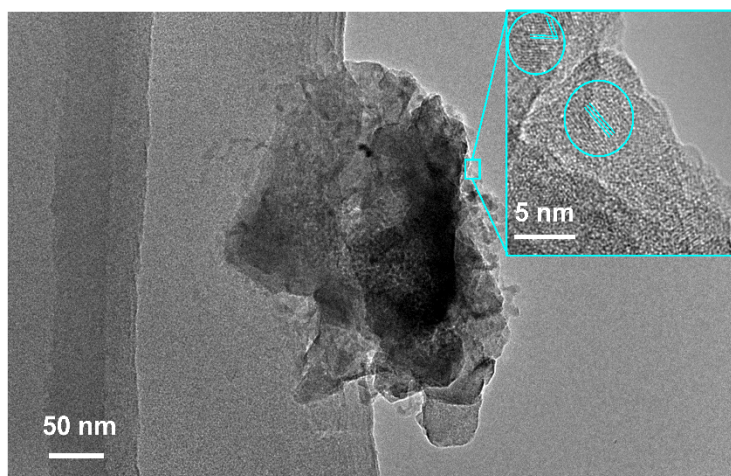

**Fig. S2** TEM image of impurities in SCC-FCA-500\*.

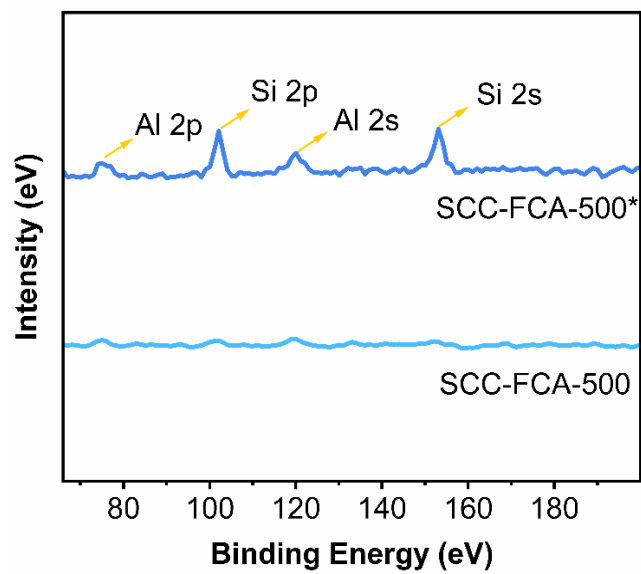

**Fig. S3** XPS local spectra of SCC-FCA-500\* and SCC-FCA-500.

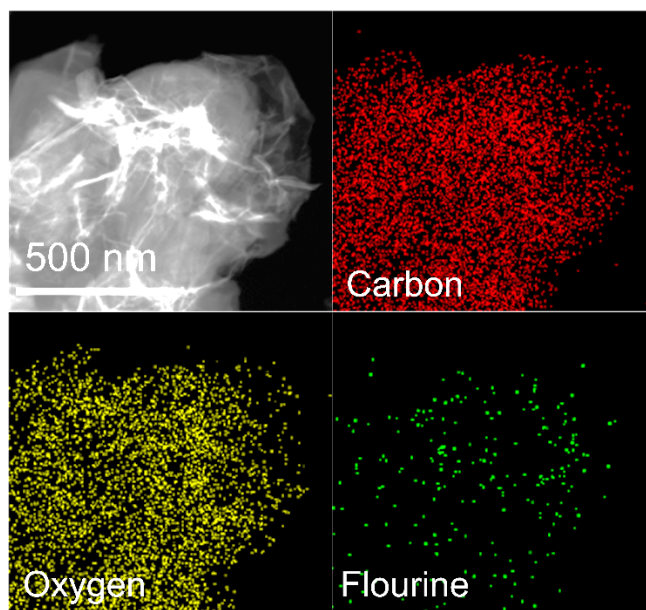

**Fig. S4** EDS element mapping images of SCC-FCA.

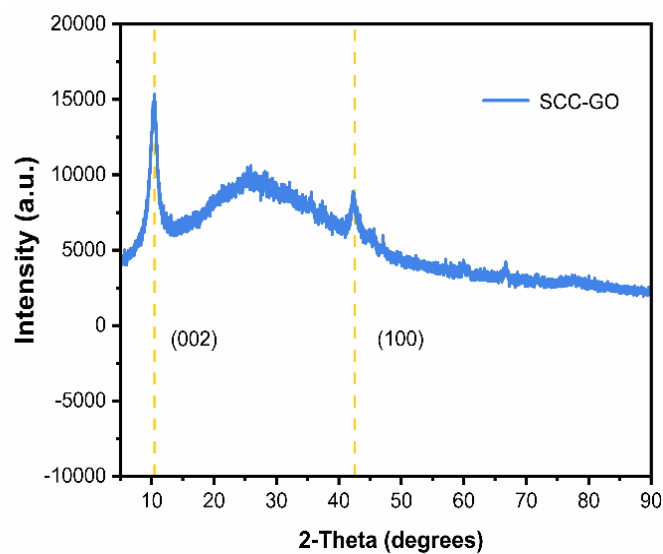

**Fig. S5** XRD patterns of SCC-GO.

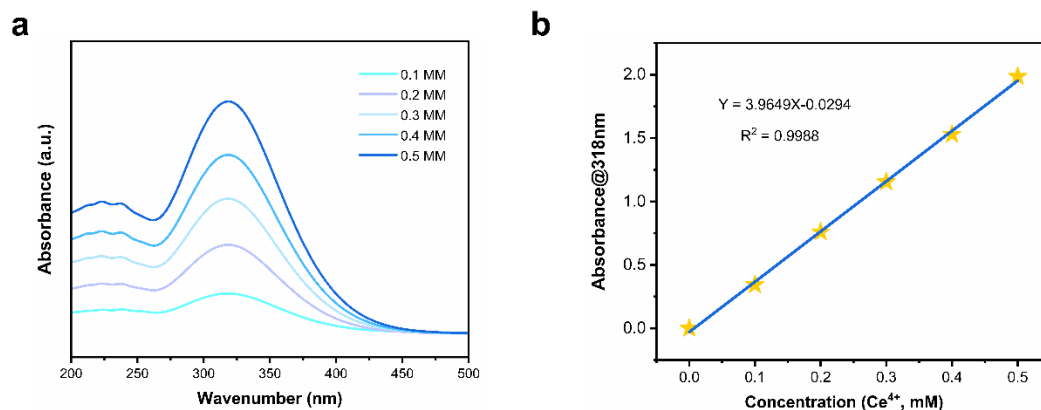

**Fig. S6** (a) UV-Vis spectra of  $\text{Ce}^{4+}$  solution with various concentrations and (b) corresponding standard curve.

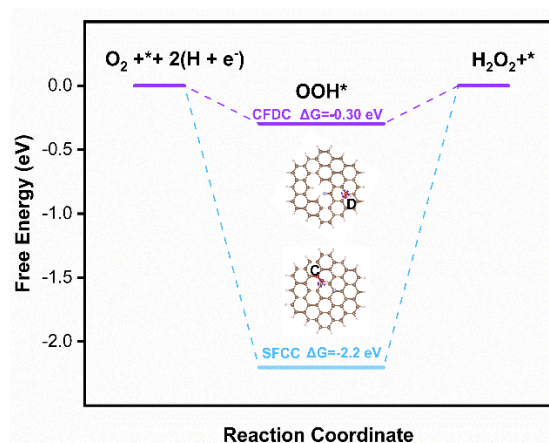

**Fig. S7** Free energy of O<sub>2</sub> reduction pathway of CFDC and SFCC.

**Table. S1** Types and proportions of elements contained in SCC in XRF.

| Elements | Concentration (w%) |
|----------|--------------------|
| F        | 32.716             |
| Na       | 28.530             |
| Al       | 8.737              |
| K        | 8.162              |
| Ca       | 6.866              |
| Si       | 5.914              |
| Fe       | 5.108              |

**Table. S2** A comparison between CFDC and SFCC for free energy and bader charge of OOH\*.

| Active Site Model | Free Energy ( $\Delta G$ ) | Bader Charge (e) |
|-------------------|----------------------------|------------------|
| CFDC              | -0.30 eV                   | 0.16             |
| SFCC              | -2.2 eV                    | 0.23             |
